# Supplementary figures and images for: MicroRNA-375 Is Downregulated in Gastric Carcinomas and Regulates Cell Survival by Targeting PDK1 and 14-3-3ζ
Source: Oxford University Press journal article supplement (doi:10.1158/0008-5472.can-09-2777), 2010-03-09

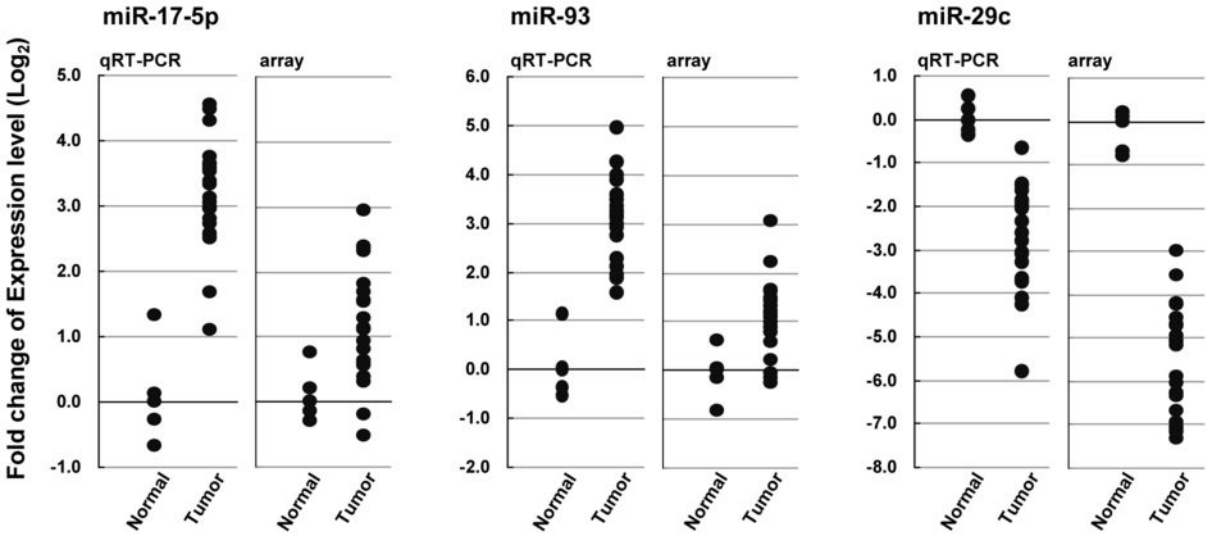

Supplement: 00085472can092777-sup-sfi_g2.pdf [file 00085472can092777-sup-sfi_g2.pdf]

30 nM of Anti-miR

C 375 C 375

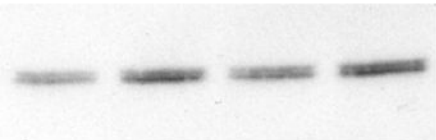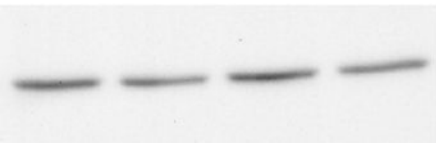

90 nM of Anti-miR

C 375 C 375

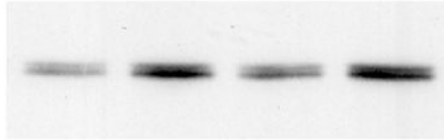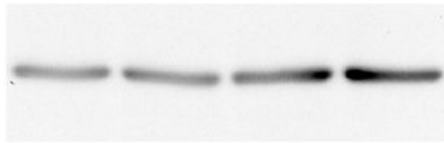

p-Akt (Thr308)

α-tubulin

Supplement: 00085472can092777-sup-sfi_g6.pdf [file 00085472can092777-sup-sfi_g6.pdf]

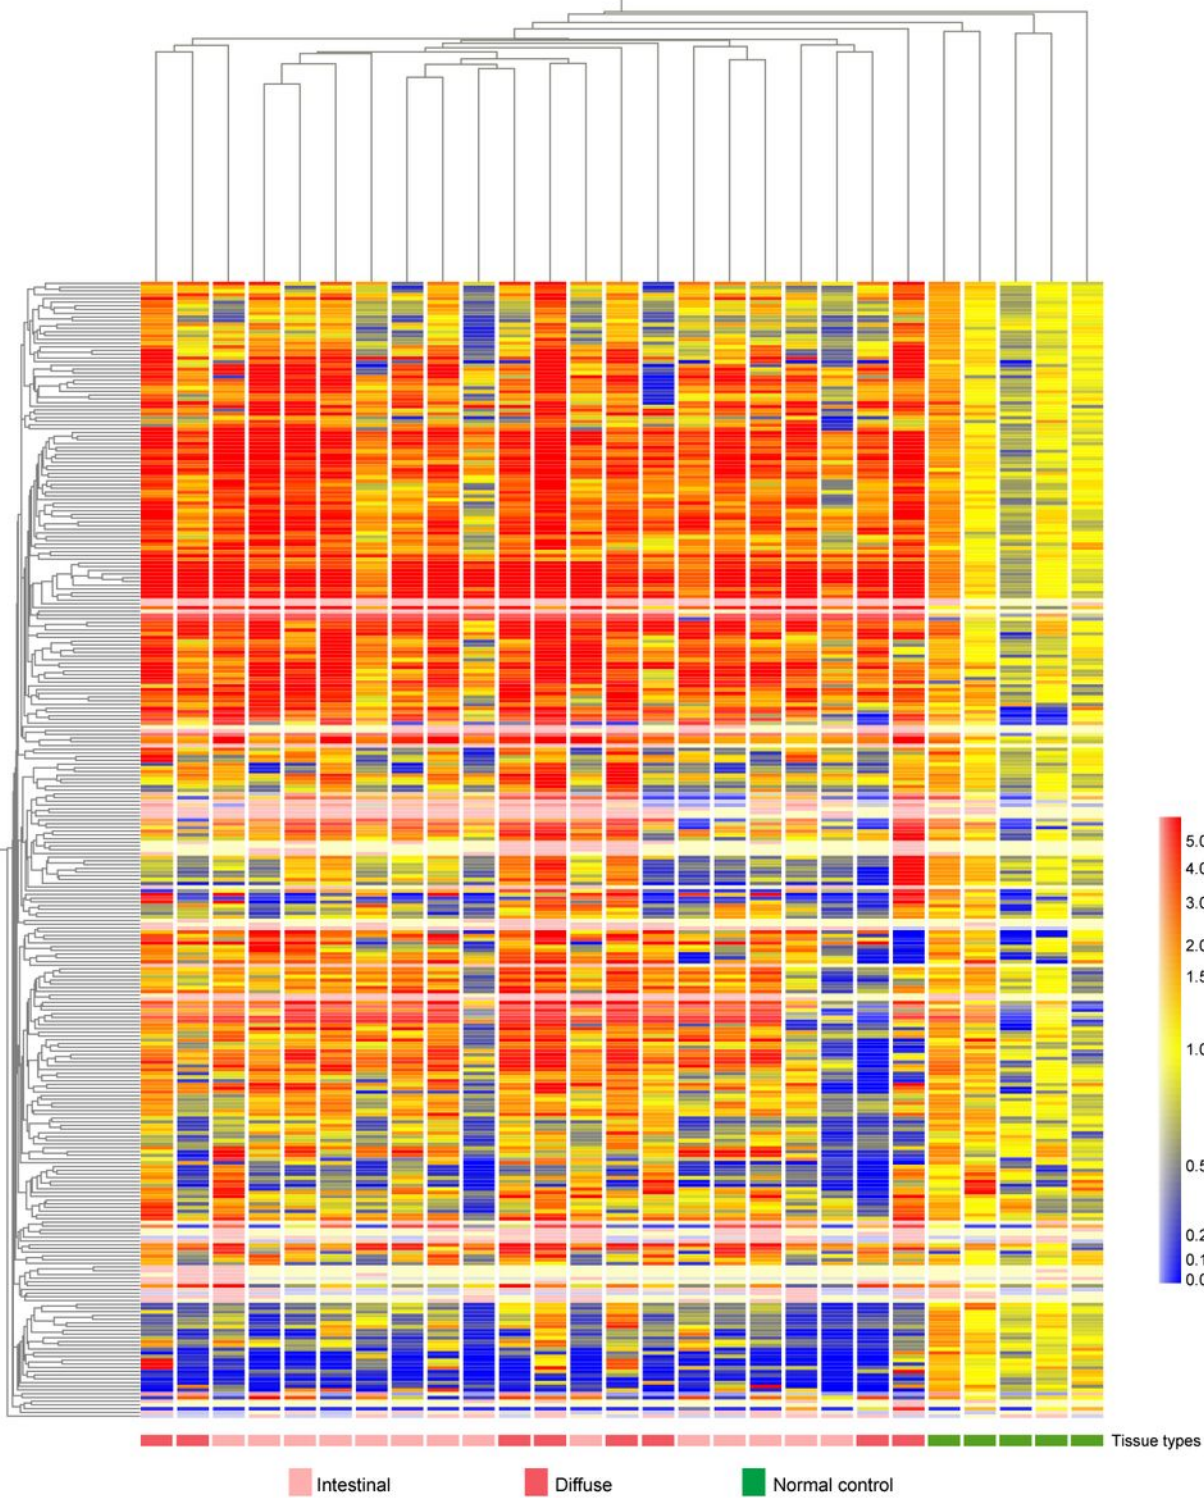

Supplement: 00085472can092777-sup-sfig_1.pdf [file 00085472can092777-sup-sfig_1.pdf]

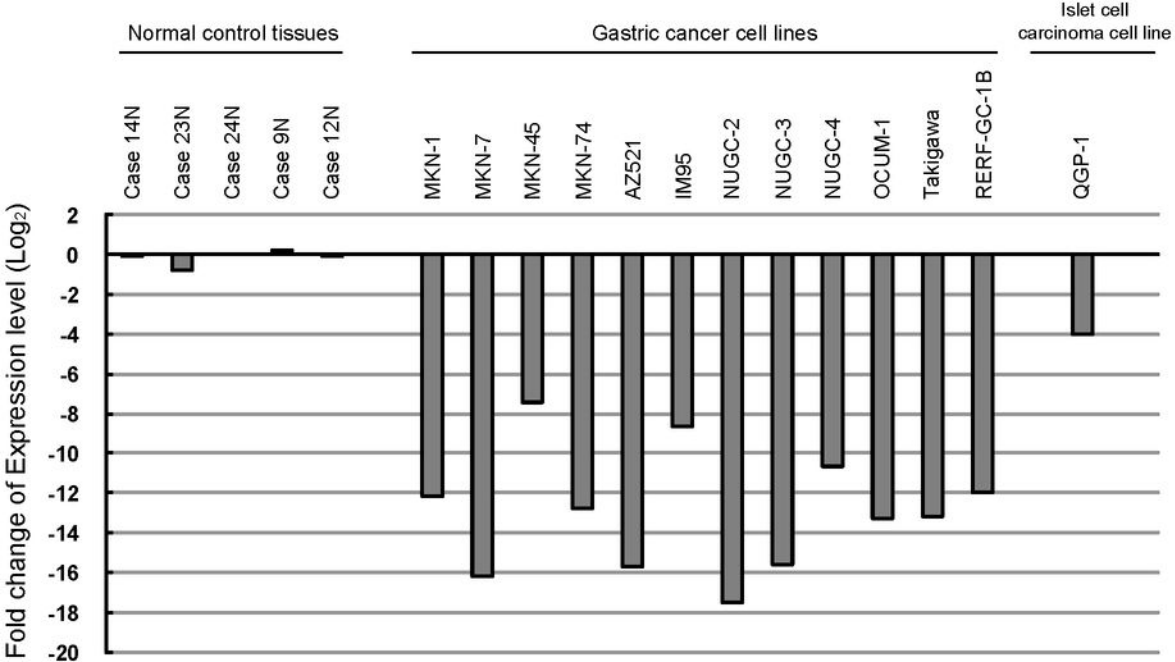

Supplement: 00085472can092777-sup-sfig_3.pdf [file 00085472can092777-sup-sfig_3.pdf]

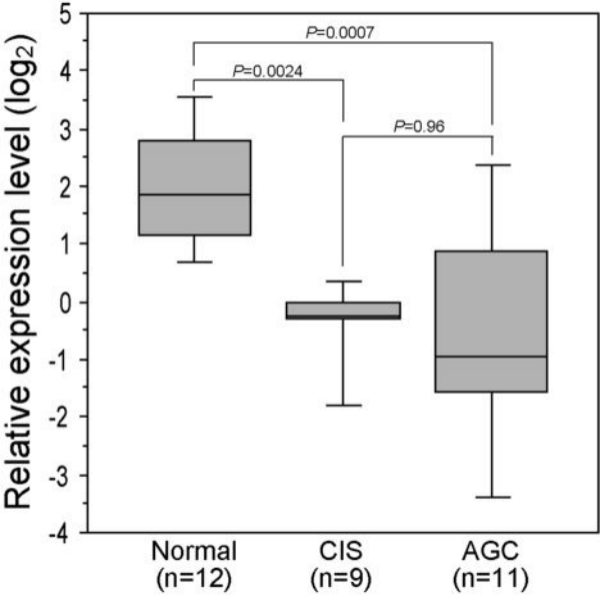

Supplement: 00085472can092777-sup-sfig_4.pdf [file 00085472can092777-sup-sfig_4.pdf]

A

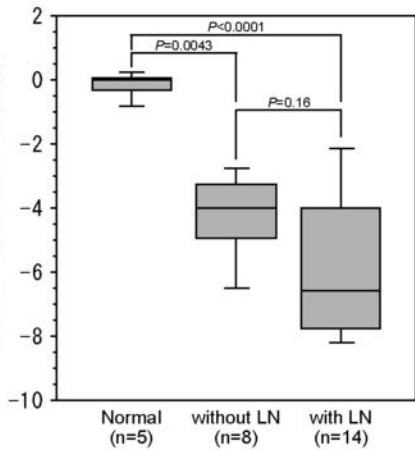

B

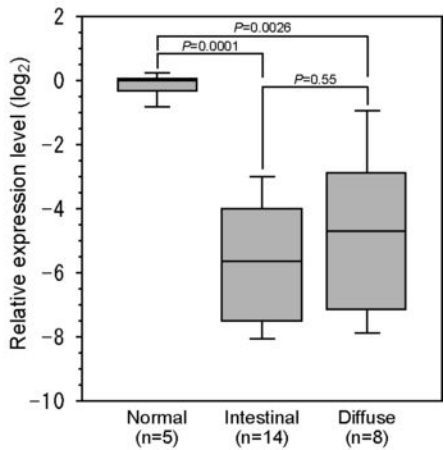

Supplement: 00085472can092777-sup-sfig_5.pdf [file 00085472can092777-sup-sfig_5.pdf]
